# Supplementary material for: Tailored Ni2P nanoparticles supported on N-doped carbon as a superior anode material for Li-ion batteries
Source: Royal Society of Chemistry journal article supplement (doi:10.1039/c9qi00480g), 2019-01-01
Supplement: c9qi00480g1.pdf [file c9qi00480g1.pdf]

*Supporting Information for*

## **Tailored Ni<sub>2</sub>P nanoparticles supported on N-doped carbon as a superior anode material for Li-ion batteries**

*Huinan Guo,<sup>§a</sup> Haichao Cai,<sup>§a</sup> Weiqin Li,<sup>a</sup> Chengcheng Chen,<sup>c</sup> Kai Chen,<sup>a</sup> Yan Zhang,<sup>a</sup> Yunwei Li,<sup>a</sup>*

*Mengying Wang,<sup>a</sup> and Yijing Wang<sup>\*a,b</sup>*

*a Key Laboratory of Advanced Energy Materials Chemistry (MOE), College of Chemistry, Nankai*

*University, Tianjin 300071, China.*

*b Collaborative Innovation Center of Chemical Science and Engineering, Nankai University, Tianjin*

*300071, China. E-mail: wangyj@nankai.edu.cn; Tel: +86 2223503639*

*c China Electronic Product Reliability and Environmental Testing Research Institute (CEPREI),*

*Guangzhou 510610, China.*

*<sup>§</sup>These authors contributed equally to this work.*

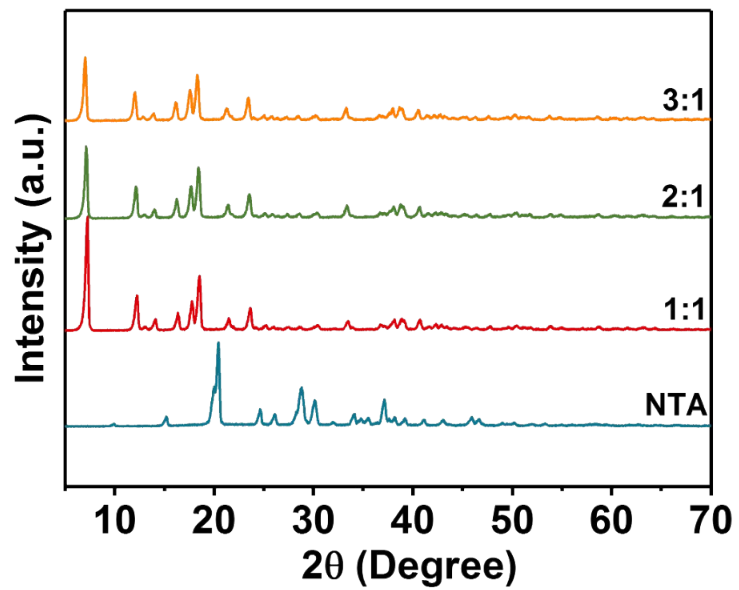

Figure S1. XRD patterns of the synthesis Ni-NTA with different molar ratio of Ni<sup>2+</sup> and NTA.

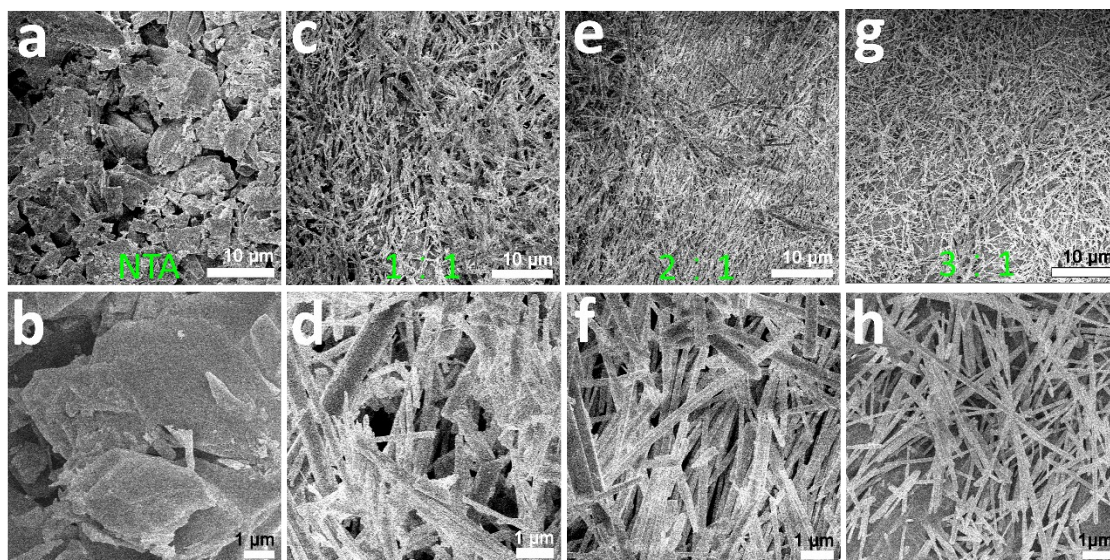

Figure S2. SEM images of Ni-NTA with different molar ratios of  $\text{Ni}^{2+}$  and NTA: (a, b) NTA, (c, d) 1:1 (e, f) 2:1, (g, h) 3:1.

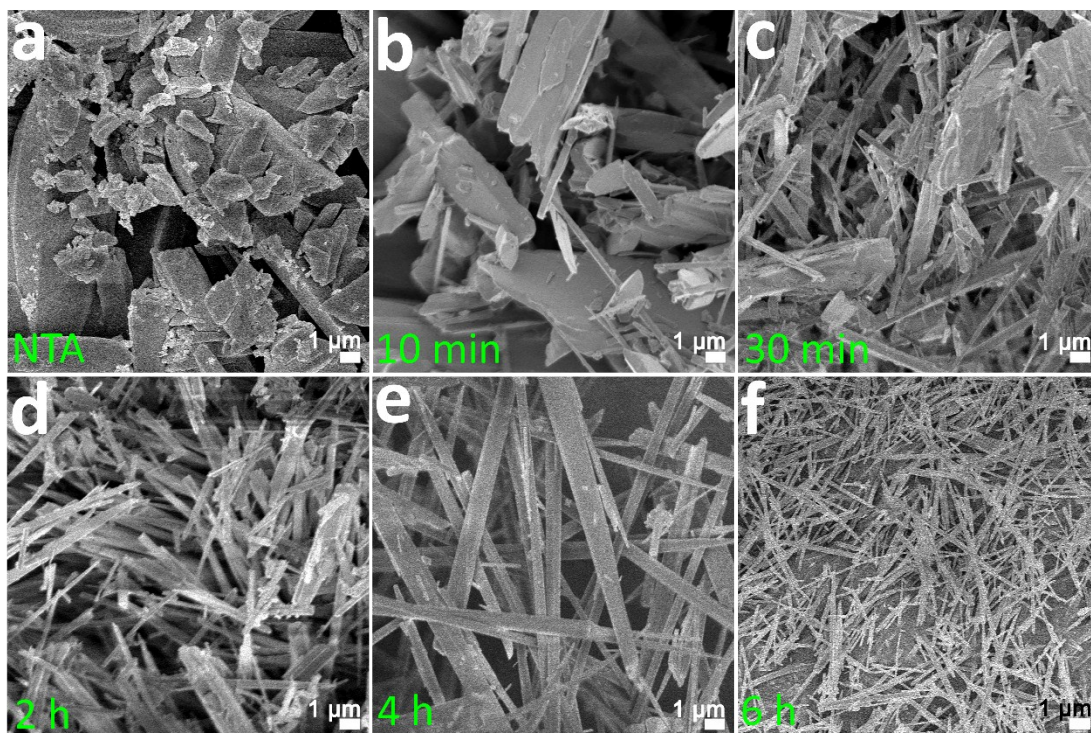

Figure S3. SEM images of Ni-NTA with different hydrothermal time: (a) NTA, (b) 10 min, (c) 30 min, (d) 2 h, (e) 4 h, (f) 6 h.

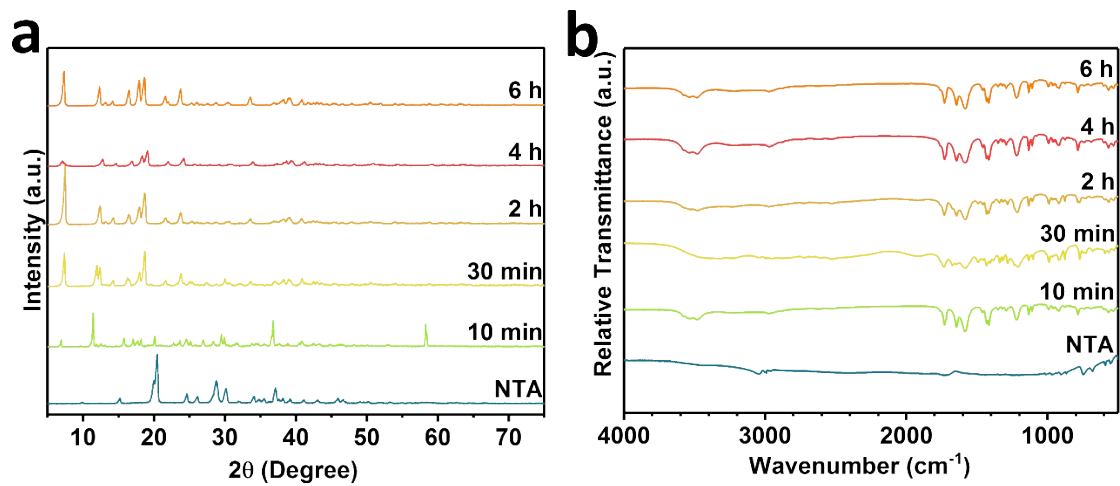

Figure S4. XRD patterns (a) and FTIR spectra (b) of Ni-NTA with different hydrothermal time.

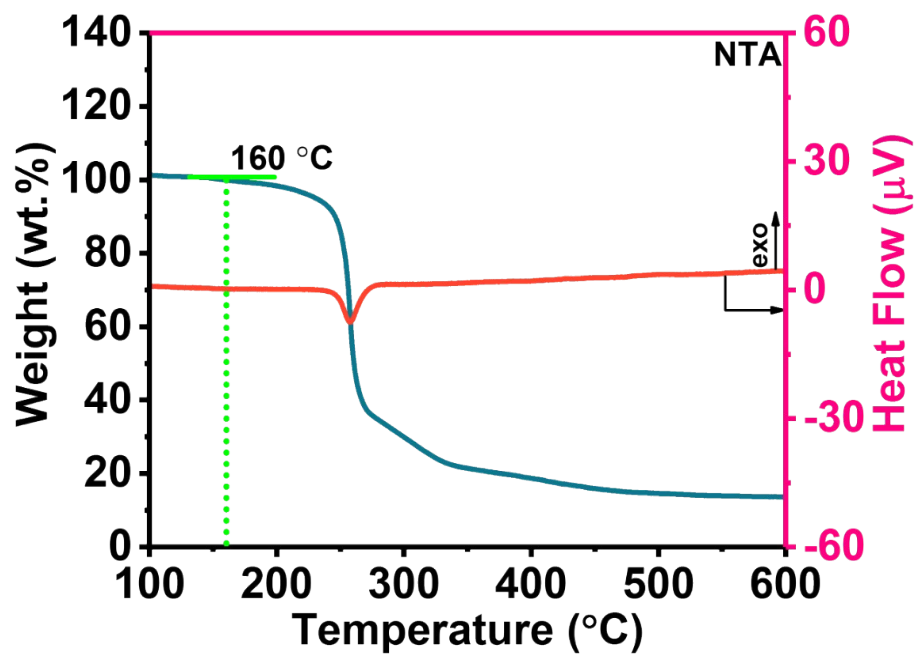

Figure S5. TGA-DTA of NTA.

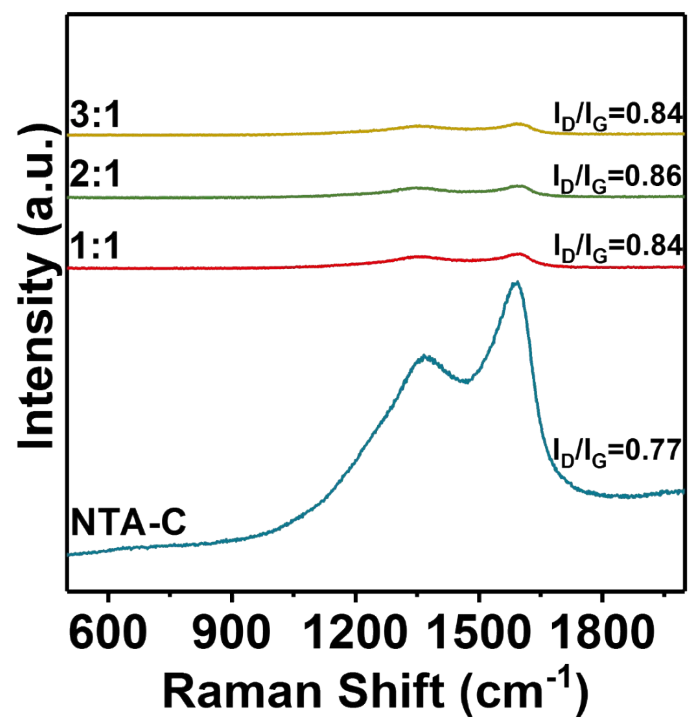

Figure S6. Raman spectra of pyrolysis product Ni@C with different molar ratios of Ni<sup>2+</sup> and NTA.

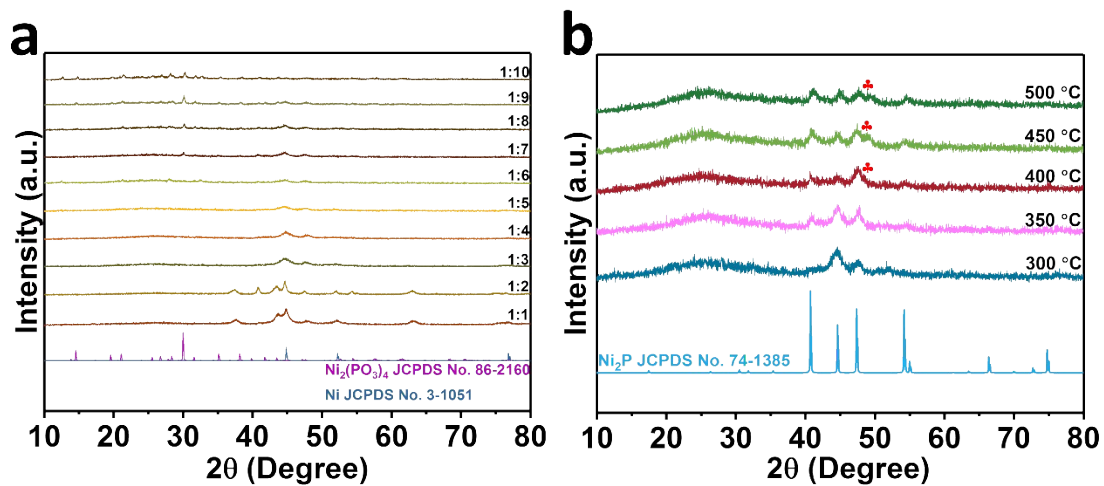

Figure S7. XRD patterns of  $\text{Ni}_2\text{P}@NPC$  with different: (a) molar ratios of Ni@C and  $\text{NaH}_2\text{PO}_2$ , (b) phosphating temperature.



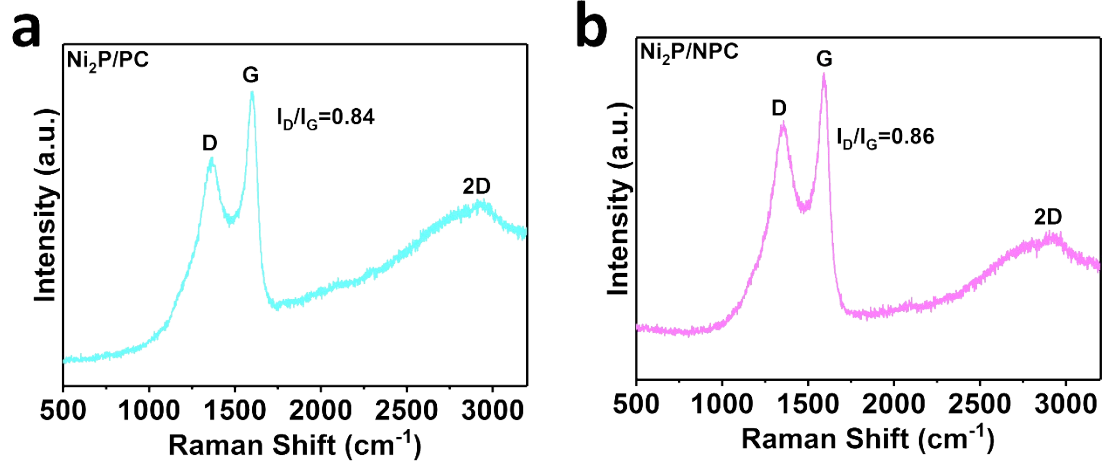

Figure S8. Raman spectra of (a)  $\text{Ni}_2\text{P}/\text{PC}$ , (b)  $\text{Ni}_2\text{P}/\text{NPC}$

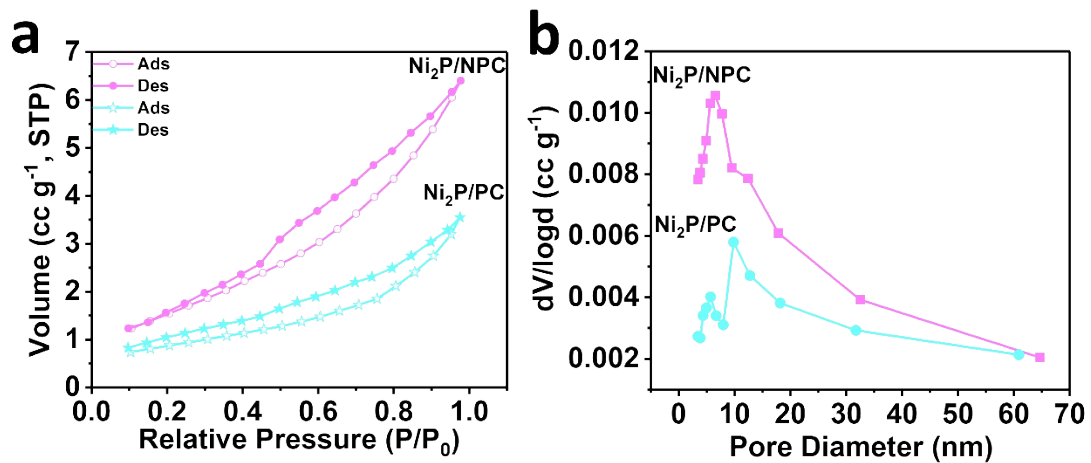

Figure S9.  $N_2$  adsorption/desorption isotherms (a) pore size distribution plots, (b) of

$Ni_2P/PC$  and  $Ni_2P/NPC$ .

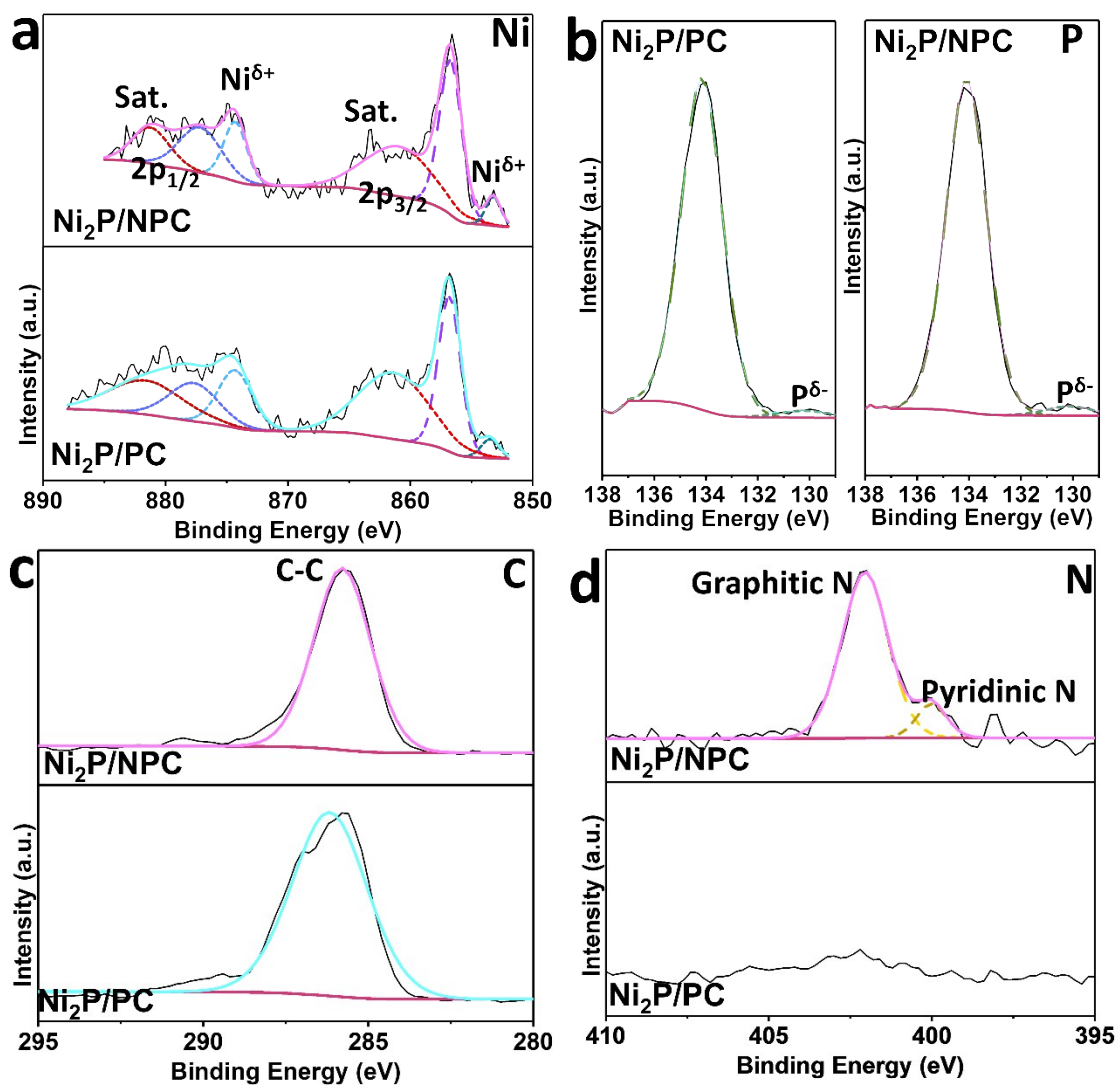

Figure S10. High resolution XPS spectra of (a) Ni 2p, (b) P 2p, (c) C 1s, (d) N 1s for

$\text{Ni}_2\text{P}/\text{PC}$  and  $\text{Ni}_2\text{P}/\text{NPC}$ .

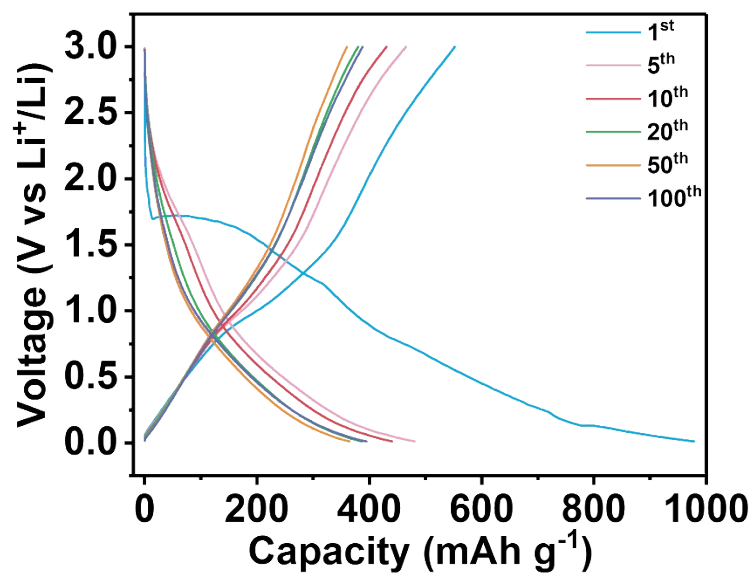

Figure S11. Charge/discharge curves of the Ni<sub>2</sub>P@PC at a current density of 100 mA g<sup>-1</sup>.

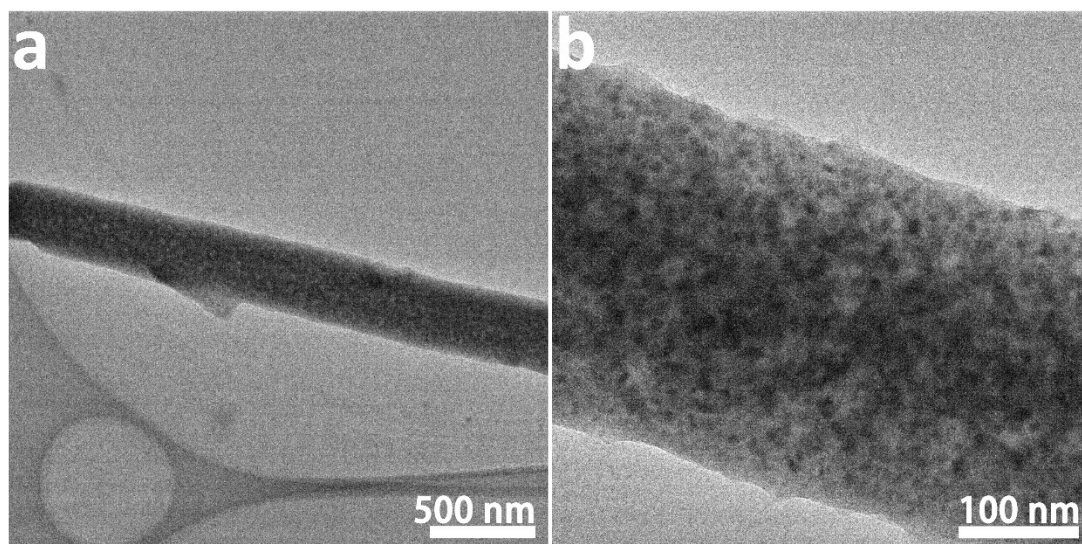

Figure S12. TEM image of Ni<sub>2</sub>P@NPC after 178 cycles.

Table S1. The elemental analysis results of Ni<sub>2</sub>P/PC and Ni<sub>2</sub>P/NPC.

| <b>Elemental Analysis Results</b> |                |                |
|-----------------------------------|----------------|----------------|
|                                   | <b>C (wt%)</b> | <b>N (wt%)</b> |
| <b>Ni<sub>2</sub>P/PC</b>         | 11.39          | 0              |
| <b>Ni<sub>2</sub>P/NPC</b>        | 10.53          | 1.22           |
